# Supplementary material for: Well-defined imidotitanium alkyl cations: agostic interactions, migratory insertion vs.[2+2] cycloaddition, and the first structurally authenticated AlMe3 adduct of any transition metal alkyl cation
Source: Royal Society of Chemistry journal article supplement (doi:10.1039/b504567c), 2005-01-01
Supplement: b504567c.pdf [file b504567c.pdf]

Well-defined imidotitanium alkyl cations:  $\alpha$ -C-H or  $\beta$ -Si-C agostic interactions, migratory insertion *vs* [2+2] cycloaddition, and the first structurally authenticated AlMe<sub>3</sub> adduct of any transition metal alkyl cation

---

## Supporting information

---

### Characterising data for [Ti(N<sup>t</sup>Bu)(Me<sub>3</sub>[9]aneN<sub>3</sub>)Me][BAR<sup>F</sup><sub>4</sub>] (3-BAR<sup>F</sup><sub>4</sub>) (NMR only)

<sup>1</sup>H NMR (C<sub>6</sub>D<sub>5</sub>Br, 299.9 MHz, 293 K): 2.34 (6H, br. m, CH<sub>2</sub>), 2.20 (9H, s, NMe), 2.15 (6H, br. m, CH<sub>2</sub>), 0.93 (9H, s, NCM<sub>3</sub>), 0.69 (3H, s, TiMe). <sup>13</sup>C{<sup>1</sup>H} NMR (C<sub>6</sub>D<sub>5</sub>Br, 75.4 MHz, 293 K): 148.8 (br. d, <sup>1</sup>J<sub>C-F</sub> 239 Hz, 2-C<sub>6</sub>F<sub>5</sub>), 138.6 (br. d, <sup>1</sup>J<sub>C-F</sub> 251 Hz, 4-C<sub>6</sub>F<sub>5</sub>), 136.7 (br. d, <sup>1</sup>J<sub>C-F</sub> 246 Hz, 3-C<sub>6</sub>F<sub>5</sub>), 69.9 (NCMe<sub>3</sub>), 55.0 (CH<sub>2</sub>), 50.5 (NMe), 40.3 (<sup>1</sup>J<sub>CH</sub> 116 Hz, TiMe), 31.4 (NCMe<sub>3</sub>). <sup>19</sup>F NMR (C<sub>6</sub>D<sub>5</sub>Br, 282.1 MHz, 293 K): -131.8 (d, <sup>3</sup>J 10.6 Hz, 2-C<sub>6</sub>F<sub>5</sub>), -161.8 (t, <sup>3</sup>J 21.2 Hz, 4-C<sub>6</sub>F<sub>5</sub>), -165.8 (app.t, app. <sup>3</sup>J 18.1 Hz, 3-C<sub>6</sub>F<sub>5</sub>).

### Characterising data for [Ti(N<sup>t</sup>Bu)(Me<sub>3</sub>[9]aneN<sub>3</sub>)(CH<sub>2</sub>SiMe<sub>3</sub>)]BAR<sup>F</sup><sub>4</sub>] (4-BAR<sup>F</sup><sub>4</sub>) (NMR only)

<sup>1</sup>H NMR (CD<sub>2</sub>Cl<sub>2</sub>, 500.0 MHz, 213 K): 3.63 (2H, m, NCH<sub>2</sub>), 3.06 (2H, m, NCH<sub>2</sub>), 2.95 (6H, s, NMe *cis*), 2.90-2.50 (8H, overlapping m, NCH<sub>2</sub>), 2.40 (3H, s, NMe *trans*), 2.02 (2H, s, CH<sub>2</sub>SiMe<sub>3</sub>), 1.11 (9H, s, NCM<sub>3</sub>), 0.17 (9H, s, CH<sub>2</sub>SiMe<sub>3</sub>). <sup>13</sup>C{<sup>1</sup>H} NMR (CD<sub>2</sub>Cl<sub>2</sub>, 125.7 MHz, 213 K): 147.6 (br. d, <sup>1</sup>J<sub>C-F</sub> 247 Hz, 2-C<sub>6</sub>F<sub>5</sub>), 137.8 (br. d, <sup>1</sup>J<sub>C-F</sub> 225 Hz, 4-C<sub>6</sub>F<sub>5</sub>), 135.9 (br. d, <sup>1</sup>J<sub>C-F</sub> 247 Hz, 3-C<sub>6</sub>F<sub>5</sub>), 69.8 (NCMe<sub>3</sub>), 55.9-54.9 (series of overlapping singlets, NCH<sub>2</sub> and CH<sub>2</sub>SiMe<sub>3</sub>), 51.5 (NMe *cis*), 48.7 (NMe *trans*), 30.7 (NCMe<sub>3</sub>), 1.3 (SiMe<sub>3</sub>). <sup>19</sup>F NMR (CD<sub>2</sub>Cl<sub>2</sub>, 282.1 MHz, 293 K): -133.5 (d, <sup>3</sup>J 10.6 Hz, 2-C<sub>6</sub>F<sub>5</sub>), -164.0 (t, <sup>3</sup>J 20.4 Hz, 4-C<sub>6</sub>F<sub>5</sub>), -167.9 (app. t, app. <sup>3</sup>J 18.1 Hz, 3-C<sub>6</sub>F<sub>5</sub>). <sup>29</sup>Si NMR (HMQC <sup>1</sup>H-observed, CD<sub>2</sub>Cl<sub>2</sub>, 299.9 MHz, 293 K): -15.9 (CH<sub>2</sub>SiMe<sub>3</sub>). <sup>29</sup>Si NMR (HMQC <sup>1</sup>H-observed, C<sub>5</sub>D<sub>5</sub>Br, 299.9 MHz, 293 K): -17.5 (CH<sub>2</sub>SiMe<sub>3</sub>).

### Characterising data for [Ti(N<sup>t</sup>Bu)(Me<sub>3</sub>[9]aneN<sub>3</sub>)(CH<sub>2</sub>SiMe<sub>3</sub>)(Ph<sub>3</sub>PO)]BAR<sup>F</sup><sub>4</sub>] (5-BAR<sup>F</sup><sub>4</sub>)

<sup>1</sup>H NMR (CD<sub>2</sub>Cl<sub>2</sub>, 499.9 MHz, 293 K): 7.83 (6H, m, 2-PPh<sub>3</sub>), 7.76 (3H, m, 4-PPh<sub>3</sub>), 7.62 (6H, m, 3-PPh<sub>3</sub>), 3.45 (1H, m, NCH<sub>2</sub>), 3.34 (1H, m, NCH<sub>2</sub>), 3.15 (3H, s, NMe *cis*), 2.95 – 2.75 (2H, overlapping m, NCH<sub>2</sub>), 2.82 (3H, s, NMe *cis*), 2.63 (2H, overlapping m, NCH<sub>2</sub>), 2.53 (2H, overlapping m, NCH<sub>2</sub>), 2.50 – 2.32 (4H, overlapping m, NCH<sub>2</sub>), 2.07 (3H, s, NMe *trans*), 1.12 (9H, s, NCM<sub>3</sub>), 0.95 (1H, d, <sup>2</sup>J 10.2 Hz, CH<sub>a</sub>H<sub>b</sub>SiMe<sub>3</sub>), 0.10 (1H, d, <sup>2</sup>J 10.2 Hz, CH<sub>a</sub>H<sub>b</sub>SiMe<sub>3</sub>), 0.04 (9H, s, CH<sub>2</sub>SiMe<sub>3</sub>). <sup>13</sup>C{<sup>1</sup>H} NMR (CD<sub>2</sub>Cl<sub>2</sub>, 125.7 MHz, 293 K): 148.5 (br. d, <sup>1</sup>J<sub>C-F</sub> 244 Hz, 2-C<sub>6</sub>F<sub>5</sub>), 138.6 (br. d, <sup>1</sup>J<sub>C-F</sub> 246 Hz, 4-C<sub>6</sub>F<sub>5</sub>), 136.8 (br. d, <sup>1</sup>J<sub>C-F</sub> 246 Hz, 3-C<sub>6</sub>F<sub>5</sub>), 134.5 (d, <sup>4</sup>J<sub>C-P</sub> 2.7 Hz, 4-C<sub>6</sub>H<sub>5</sub>), 133.6 (d, <sup>2</sup>J<sub>C-P</sub> 11.4 Hz, 2-C<sub>6</sub>H<sub>5</sub>), 129.7 (d, <sup>3</sup>J<sub>C-P</sub> 6.1

Hz, 3-C<sub>6</sub>H<sub>5</sub>), 69.4 (NCMe<sub>3</sub>), 57.7 (CH<sub>2</sub>), 56.9 (CH<sub>2</sub>), 56.2 (CH<sub>2</sub>), 56.0 (CH<sub>2</sub>), 55.1 (CH<sub>2</sub>), 54.0 (CH<sub>2</sub>), 53.7 (NMe *cis*), 52.2 (NMe *cis*), 50.0 (CH<sub>2</sub>SiMe<sub>3</sub>), 48.9 (NMe *trans*), 33.1 (NCMe<sub>3</sub>), 4.1 (SiMe<sub>3</sub>). <sup>19</sup>F NMR (CD<sub>2</sub>Cl<sub>2</sub>, 282.1 MHz, 293 K): -133.5 (d, <sup>3</sup>J 10.6 Hz, 2-C<sub>6</sub>F<sub>5</sub>), -164.0 (t, <sup>3</sup>J 20.4 Hz, 4-C<sub>6</sub>F<sub>5</sub>), -167.9 (app. t, app. <sup>3</sup>J 18.1 Hz, 3-C<sub>6</sub>F<sub>5</sub>). <sup>31</sup>P {<sup>1</sup>H} NMR (CD<sub>2</sub>Cl<sub>2</sub>, 121.5 MHz, 293 K): 43.4 (PPh<sub>3</sub>). <sup>29</sup>Si NMR (HMQC <sup>1</sup>H-observed, CD<sub>2</sub>Cl<sub>2</sub>, 299.9 MHz, 293 K): -0.7 (CH<sub>2</sub>SiMe<sub>3</sub>). IR (NaCl plates, Nujol mull, cm<sup>-1</sup>): 2921 (s, br.), 2853 (s), 1643 (m), 1592 (w), 1513 (s), 1412 (w), 1354 (w), 1299 (w), 1275 (m), 1231 (m), 1205 (w), 1141 (s), 1121 (s), 1086 (s), 1007 (m), 980 (s), 907 (m), 849 (m), 820 (m), 775 (m), 755 (m), 726 (s), 695 (m), 684 (m), 662 (m). Anal. Found (calcd. for C<sub>59</sub>H<sub>56</sub>BF<sub>20</sub>N<sub>4</sub>OPSiTi.0.33C<sub>6</sub>H<sub>14</sub>): C 53.9 (53.7), H 4.6 (4.5), N 4.1 (4.1).

**Characterising data for [Ti(N<sup>t</sup>Bu)(Me<sub>3</sub>[9]aneN<sub>3</sub>){Me<sub>3</sub>SiCH<sub>2</sub>C(N<sup>i</sup>Pr)<sub>2</sub>}[BAR<sup>F</sup><sub>4</sub>] (6-BAR<sup>F</sup><sub>4</sub>)**

<sup>1</sup>H NMR (CD<sub>2</sub>Cl<sub>2</sub>, 499.9 MHz, 293 K): 3.96 (2H, app. sept., app. <sup>3</sup>J 6.6 Hz, CHMe<sub>2</sub>), 3.86 (2H, m, NCH<sub>2</sub>), 3.26 (6H, s, NMe *cis*), 3.18 (2H, m, NCH<sub>2</sub>), 2.98 (2H, m, NCH<sub>2</sub>), 2.86 (2H, m, NCH<sub>2</sub>), 2.65 - 2.50 (4H, overlapping m, NCH<sub>2</sub>), 2.25 (2H, s, CH<sub>2</sub>SiMe<sub>3</sub>), 2.12 (3H, s, NMe *trans*), 1.41 (6H, d, <sup>3</sup>J 6.6 Hz, CHMe<sub>2</sub>), 1.21 (6H, d, <sup>3</sup>J 6.6 Hz, CHMe<sub>2</sub>), 1.01 (9H, s, NCMe<sub>3</sub>), 0.16 (9H, s, SiMe<sub>3</sub>). <sup>13</sup>C {<sup>1</sup>H} NMR (CD<sub>2</sub>Cl<sub>2</sub>, 75.4 MHz, 293 K): 168.5 (CCH<sub>2</sub>SiMe<sub>3</sub>), 148.5 (br. d, <sup>1</sup>J<sub>C-F</sub> 238 Hz, 2-C<sub>6</sub>F<sub>5</sub>), 138.6 (br. d, <sup>1</sup>J<sub>C-F</sub> 247 Hz, 4-C<sub>6</sub>F<sub>5</sub>), 136.7 (br. d, <sup>1</sup>J<sub>C-F</sub> 250 Hz, 3-C<sub>6</sub>F<sub>5</sub>), 70.8 (NCMe<sub>3</sub>), 57.5 (NCH<sub>2</sub>), 56.6 (NCH<sub>2</sub>), 54.2 (NCH<sub>2</sub>), 52.4 (NMe *cis*), 50.4 (CHMe<sub>2</sub>), 47.2 (NMe *trans*), 32.7 (NCMe<sub>3</sub>), 26.4 (CHMe<sub>2</sub>), 25.1 (CHMe<sub>2</sub>), 17.1 (CH<sub>2</sub>SiMe<sub>3</sub>), -0.1 (SiMe<sub>3</sub>). <sup>19</sup>F NMR (CD<sub>2</sub>Cl<sub>2</sub>, 282.1 MHz, 293 K): -133.5 (d, <sup>3</sup>J 10.6 Hz, 2-C<sub>6</sub>F<sub>5</sub>), -164.0 (t, <sup>3</sup>J 20.4 Hz, 4-C<sub>6</sub>F<sub>5</sub>), -167.9 (app. t, app. <sup>3</sup>J 18.1 Hz, 3-C<sub>6</sub>F<sub>5</sub>). <sup>29</sup>Si NMR (HMQC <sup>1</sup>H-observed, CD<sub>2</sub>Cl<sub>2</sub>, 299.9 MHz, 293 K): 2.1 (CH<sub>2</sub>SiMe<sub>3</sub>). IR (NaCl plates, Nujol mull, cm<sup>-1</sup>): 2920 (s), 2853 (s), 1642 (m), 1513 (s), 1204 (w), 979 (s), 775 (w), 757 (w), 683 (w), 663 (m). ES<sup>+</sup>MS (MeCN): *m/z* 503.6 (12%) [M]<sup>+</sup>, 215.2 (100%) [<sup>i</sup>PrNHC(CH<sub>2</sub>SiMe<sub>3</sub>)NH<sup>i</sup>Pr]<sup>+</sup>, 172.2 (13%) [Me<sub>3</sub>[9]aneN<sub>3</sub>H]<sup>+</sup>. Anal. Found (calcd. for C<sub>48</sub>H<sub>55</sub>BF<sub>20</sub>N<sub>6</sub>SiTi): C 48.9 (48.8), H 4.8 (4.7), N 7.2 (7.1).

**Characterising data for [Ti(N<sup>t</sup>Bu)(Me<sub>3</sub>[9]aneN<sub>3</sub>)(*m*-Me)<sub>2</sub>AlMe<sub>2</sub>][BAR<sup>F</sup><sub>4</sub>] (7-BAR<sup>F</sup><sub>4</sub>)**

<sup>1</sup>H NMR (CD<sub>2</sub>Cl<sub>2</sub>, 500.3 MHz, 293 K): 3.76 (2H, m, CH<sub>2</sub>), 3.19 (2H, m, CH<sub>2</sub>), 3.18 (6H, s, NMe *cis*), 2.96 (2H, m, CH<sub>2</sub>), 2.84 (2H, m, CH<sub>2</sub>), 2.75 (2H, m, CH<sub>2</sub>), 2.64 (2H, m, CH<sub>2</sub>), 2.34 (3H, s, NMe *trans*), 1.14 (9H, s, NCMe<sub>3</sub>), 0.86 (6H, s,  $\mu$ -AlMe<sub>2</sub>), -0.48 (3H, s, AlMe “down”), -0.87 (3H, s, AlMe “up”). <sup>13</sup>C {<sup>1</sup>H} NMR (CD<sub>2</sub>Cl<sub>2</sub>, 125.8 MHz, 293 K): 148.1 (br. d, <sup>1</sup>J<sub>C-F</sub> 243 Hz, 2-C<sub>6</sub>F<sub>5</sub>), 138.2 (br. d, <sup>1</sup>J<sub>C-F</sub> 243 Hz, 4-C<sub>6</sub>F<sub>5</sub>), 136.2 (br. d, <sup>1</sup>J<sub>C-F</sub> 243 Hz, 3-C<sub>6</sub>F<sub>5</sub>), 73.2 (NCMe<sub>3</sub>), 57.1 (CH<sub>2</sub>), 56.6 (CH<sub>2</sub>), 55.7 (CH<sub>2</sub>), 54.5 (NMe *cis*), 49.9 (NMe *trans*), 30.2 (NCMe<sub>3</sub>), 23.3 ( $\mu$ -AlMe<sub>2</sub>), -4.9 (br., AlMe “down”), -7.6 (br., AlMe “up”). <sup>19</sup>F NMR (CD<sub>2</sub>Cl<sub>2</sub>, 282.1 MHz, 293 K): -133.5 (d, <sup>3</sup>J 10.6 Hz, 2-C<sub>6</sub>F<sub>5</sub>), -164.0 (t, <sup>3</sup>J 20.4 Hz, 4-C<sub>6</sub>F<sub>5</sub>), -167.9 (app. t, app. <sup>3</sup>J 18.1 Hz, 3-C<sub>6</sub>F<sub>5</sub>). Selected <sup>1</sup>H NMR shifts and <sup>1</sup>J<sub>C-H</sub> coupling constants in C<sub>6</sub>D<sub>5</sub>Br (299.9 MHz, 293 K): 0.38 (6H, s, <sup>1</sup>J<sub>C-H</sub> 110 Hz,  $\mu$ -AlMe<sub>2</sub>), -0.45 (3H, s, <sup>1</sup>J<sub>C-H</sub> 113 Hz, AlMe “down”), -0.87 (3H, s,

$^1J_{\text{C-H}}$  113 Hz, AlMe “up”). IR (NaCl plates, Nujol mull,  $\text{cm}^{-1}$ ): 2922 (s, br.), 2860 (s), 1644 (s), 1515 (s), 1299 (w), 1271 (s), 1233 (s), 1199 (w), 1086 (s), 998 (m), 979 (s), 889 (w), 784 (m), 775 (m), 756 (m), 736 (m), 725 (m), 684 (m), 661 (m). Anal. Found (calcd. for  $\text{C}_{41}\text{H}_{42}\text{AlBF}_{20}\text{N}_4\text{Ti}$ ): C 46.5 (46.6), H 3.9 (4.0), N 5.3 (5.3). “Up” and “down” refer to the orientation with respect to the triazacyclononane ring.

### Computational Details

Calculations were carried out with the hybrid B3PW91 density functional,<sup>1,2</sup> as implemented in the Gaussian03 package<sup>3</sup> on the model systems  $[\text{Ti}(\text{NMe})(\text{H}_3[9]\text{aneN}_3)\text{R}_2]$  (R = Me (**1a**) or R =  $\text{CH}_2\text{SiMe}_3$  (**2a**)),  $[\text{Ti}(\text{NMe})(\text{H}_3[9]\text{aneN}_3)\text{R}]^+$  (R = Me (**3a**) or  $\text{CH}_2\text{SiMe}_3$  (**4a**)) and  $[\text{Ti}(\text{NMe})(\text{H}_3[9]\text{aneN}_3)(\mu\text{-Me})_2\text{AlMe}_2]^+$ . The Ti and Si atoms were represented with the quasi relativistic effective core pseudo-potentials (RECP) of the Stuttgart group and the associated basis sets augmented with a polarization function ( $\alpha = 0.500$ , Ti;  $\alpha = 0.284$ , Si).<sup>4,5</sup> The remaining atoms (C, H, Al and N) were represented with 6-31G(d,p) basis sets.<sup>6</sup> This ensemble of RECP and basis sets is called BI. The B3PW91 geometry optimizations were performed without any symmetry constraints and the nature of the extrema (local minima or transition states) was checked by analytical frequency calculations. The NMR calculations were performed at the B3PW91 level on the B3PW91/BI geometries with a basis set consisting of the all-electron Wachters basis set for Ti<sup>7</sup> supplemented by a f polarization function,<sup>8</sup> and IGLOO-II type basis set for C, H, N, and Si.<sup>9</sup> The chemical shifts and J(C-H) coupling constants were computed in the GIAO approximation as implemented in Gaussian03.<sup>10</sup> The GIAO magnetic shielding tensor of the Si, C, and H atoms were evaluated at the B3PW91/IGLOO-II level for the  $\text{SiMe}_4$  molecule optimized with the same method and basis set to serve as a reference for the calculation of the chemical shifts.

---

(1) Becke, A. D. *J. Chem. Phys.* **1993**, *98*, 5648.

(2) Perdew, J. P.; Wang, Y. *Phys. Rev. B* **1992**, *45*, 13244.

(3) Frisch, M. J.; Trucks, G. W.; Schlegel, H. B.; Scuseria, G. E.; Robb, M. A.; Cheeseman, J. R.; Montgomery, Jr., J. A.; Vreven, T.; Kudin, K. N.; Burant, J. C.; Millam, J. M.; Iyengar, S. S.; Tomasi, J.; Barone, V.; Mennucci, B.; Cossi, M.; Scalmani, G.; Rega, N.; Petersson, G. A.; Nakatsuji, H.; Hada, M.; Ehara, M.; Toyota, K.; Fukuda, R.; Hasegawa, J.; Ishida, M.; Nakajima, T.; Honda, Y.; Kitao, O.; Nakai, H.; Klene, M.; Li, X.; Knox, J. E.; Hratchian, H. P.; Cross, J. B.; Adamo, C.; Jaramillo, J.; Gomperts, R.; Stratmann, R. E.; Yazyev, O.; Austin, A. J.; Cammi, R.; Pomelli, C.; Ochterski, J. W.; Ayala, P. Y.; Morokuma, K.; Voth, G. A.; Salvador, P.; Dannenberg, J. J.; Zakrzewski, V. G.; Dapprich, S.; Daniels, A. D.; Strain, M. C.; Farkas, O.; Malick, D. K.; Rabuck, A. D.; Raghavachari, K.; Foresman, J. B.; Ortiz, J. V.; Cui, Q.; Baboul, A. G.; Clifford, S.; Cioslowski, J.; Stefanov, B. B.; Liu, G.; Liashenko, A.; Piskorz, P.; Komaromi, I.; Martin, R. L.; Fox, D. J.; Keith, T.; Al-Laham, M. A.; Peng, C. Y.; Nanayakkara, A.;

---

Challacombe, M.; Gill, P. M. W.; Johnson, B.; Chen, W.; Wong, M. W.; Gonzalez, C.; and Pople, J. A.; *Gaussian 03* Gaussian, Inc., Wallingford CT, **2004**.

(4) Andrae, D.; Häussermann, U.; Dolg, M.; Stoll, H.; Preuss, H.; *Theor. Chim. Acta*, **1990**, *77*, 123.

(5) Bergner, A.; Dolg, M.; Küchle, W.; Stoll, H.; Preuss, H. *Mol. Phys.* **1990**, *30*, 1431.

(6) Hehre, W. J.; Ditchfield, R.; Pople, J. A. *J. Chem. Phys.* **1972**, *56*, 2257.

(7) Wachters, J. H. *J. Chem. Phys.* **1970**, *52*, 1033.

(8) Bauschlicher, C. W.; Langhoff Jr., S. R.; Barnes, L. A. *J. Chem. Phys.* **1989**, *91*, 2399.

(9) Kutzelnigg, W.; Fleischer, U.; Schindler, M. *The IGLO-Method: Ab initio calculation and interpretation of NMR chemical shifts and magnetic susceptibilities* **1990**, vol. 23, Springer-Verlag, Heidelberg. See <http://www.emsl.pnl.gov/forms/basisform.html> to obtain the basis sets.

(10) Helgaker, T.; Watson, M.; Handy, N. C. *J. Chem. Phys.* **2000**, *113*, 9402.
