# Supplementary figures and images for: Well-defined imidotitanium alkyl cations: agostic interactions, migratory insertion vs.[2+2] cycloaddition, and the first structurally authenticated AlMe3 adduct of any transition metal alkyl cation
Source: Royal Society of Chemistry journal article supplement (doi:10.1039/b504567c), 2005-01-01

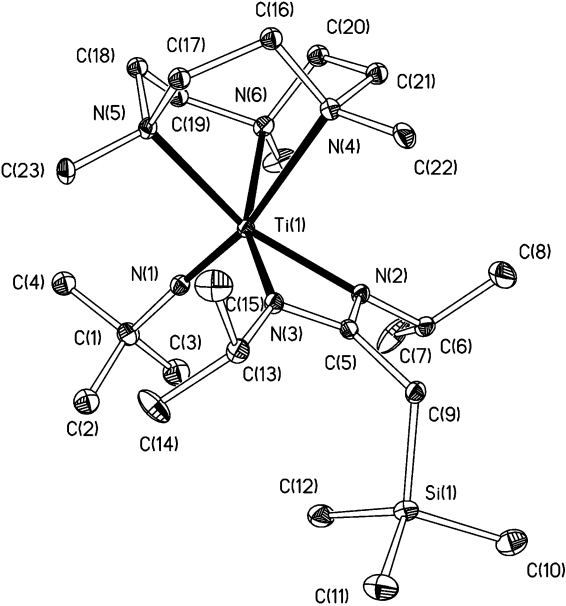

Supplement: b504567c-f2.pdf [file b504567c-f2.pdf]
